# Supplementary material for: Site Specific Genetic Incorporation of Azidophenylalanine in Schizosaccharomyces pombe
Source: PubMed Central journal article supplement (PMC4657001; doi:10.1038/srep17196), 2015-11-24
Supplement: srep17196-s1.pdf [file srep17196-s1.pdf]

## Supplemental Information

### Site Specific Genetic Incorporation of Azidophenylalanine in *Schizosaccharomyces pombe*

Nan Shao<sup>1,2,3</sup>, N. Sadananda Singh<sup>3</sup>, Susan E. Slade<sup>4</sup>, Alexandra M.E. Jones<sup>4</sup>, \*Mohan K. Balasubramanian<sup>1,2,3,5</sup>

<sup>1</sup> Division of Biomedical Cell Biology, Warwick Medical School, University of Warwick, Coventry, UK CV4 7AL

<sup>2</sup> Department of Biological Sciences, National University of Singapore, Singapore 117543

<sup>3</sup> Temasek Life Sciences Laboratory, National University of Singapore, 1 Research Link, Singapore 117604

<sup>4</sup> School of Life Sciences, University of Warwick, Coventry, UK CV4 7AL

<sup>5</sup> Mechanobiology Institute, 5A Engineering Drive 1, National University of Singapore, Singapore 117411

\*Corresponding author

Correspondence to Mohan K. Balasubramanian: Email: [M.K.Balasubramanian@warwick.ac.uk](mailto:M.K.Balasubramanian@warwick.ac.uk)

#### Supplemental Inventory

**Supplemental Figure** Schematic representation of the conversion between azido-phenylalanine and amino-phenylalanine

**Supplemental Table S1.** List of strains used in this study

**Supplemental Table S2.** List of constructs generated in this study

#### Supplemental Methods

Trichloroacetic Acid (TCA) Precipitation and Filter Aided Sample Preparation (FASP)

Gel processing, enzymatic digestion and peptide extraction

nanoLC-ESI-MS/MS Analysis

MS Data Analysis

## Supplemental Figure

A

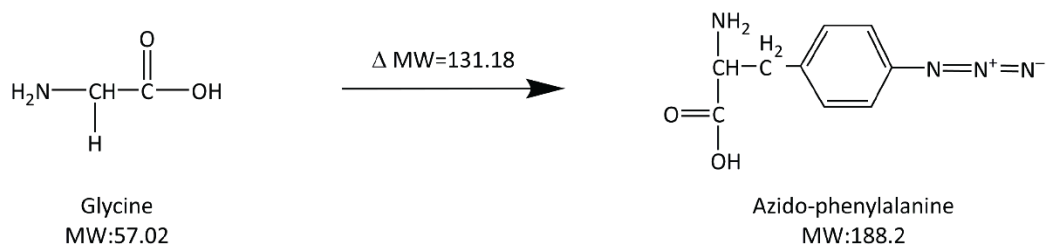

B

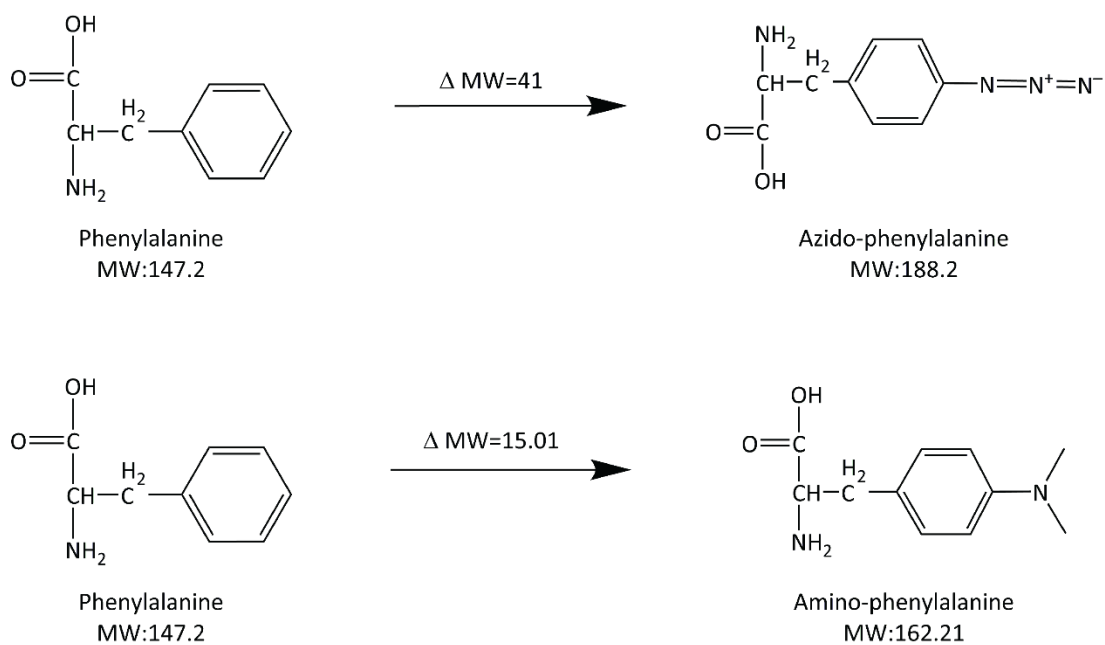

**Supplemental Figure** Schematic representation of the conversion between azido-phenylalanine and amino-phenylalanine

(A) The mass difference between glycine and azido-phenylalanine is 131.18 kDa.

(B) The mass difference between phenylalanine and azido-phenylalanine is 41 kDa; The mass difference between phenylalanine and amino-phenylalanine is 15.01 kDa

**Supplemental Table S1: *S. pombe* strains used in this study**

| Strain No. | Genotype                                                                                                           | Source     |
|------------|--------------------------------------------------------------------------------------------------------------------|------------|
| MBY7903    | ade6-704 ura4-294 leu1-32 his5DEL                                                                                  | This study |
| MBY8487    | act1 promoter -azpRS::leu, ade6-704 ura4-294 leu1-32 his5DEL                                                       | This study |
| MBY8570    | act1 promoter -EcoYRS(WT)-FLAG::leu1+ ade6-704 ura4-294 his5DEL                                                    | This study |
| MBY8654    | ade6-704 ura4-294 leu1-32 his5DEL, pNO13T-his5TAG-sup3.5-met                                                       | This study |
| MBY8655    | ade6-704 ura4-294 leu1-32 his5DEL , pNO13T-his5TAG-sup3.5-EcoYtRNA                                                 | This study |
| MBY8744    | act1 promoter -EcoYRS(WT)-FLAG::leu1+ ade6-704 ura4-294 his5DEL, pNO13-sup3.5-ecoYtRNA-nmt1-mini-his5TAG-6xhis-tag | This study |
| MBY8745    | act1 promoter -EcoYRS(WT)-FLAG::leu1+ ade6-704 ura4-294 his5DEL, pNO13-sup3.5-ecoYtRNA-nmt1-mini-GST-52-TAG        | This study |
| MBY8746    | act1 promoter -azpRS::leu, pNO13T-his5TAG-sup3.5-EcoYtRNA                                                          | This study |
| MBY8747    | act1 promoter -azpRS::leu, pNO13-sup3.5-ecoYtRNA-nmt1-mini-his5TAG-6xhis-tag                                       | This study |
| MBY8748    | act1 promoter -azpRS::leu, pNO13-sup3.5-ecoYtRNA-nmt1-mini-GST-52-TAG                                              | This study |
| MBY8897    | act1 promoter -EcoYRS(WT)-FLAG::leu1+, pNO13-sup3.5-ecoYtRNA-ura4-nmt1-mini-GST-52-TAG-6xhis-tag                   | This study |
| MBY8898    | act1 promoter -azpRS::leu, pNO13-sup3.5-ecoYtRNA-ura4-nmt1-mini-GST-52-TAG-6xhis-tag                               | This study |
| MBY8965    | act1 promoter -EcoYRS(WT)-FLAG::leu1+, pNO13-sup3.5-ecoYtRNA-ura4- nmt1-mini-rlc1-TAG-gfp                          | This study |
| MBY8966    | act1 promoter -azpRS::leu+, pNO13-sup3.5-ecoYtRNA ura4- -nmt1-mini-rlc1-TAG-gfp                                    | This study |
| MBY10026   | act1 promoter -azpRS::leu, ade6-704, pNO13-sup3.5-ecoYtRNA-ura4-nmt1-mini-GST(Glycine 6TAG)-6xhis                  | This study |
| MBY10031   | act1 promoter -EcoYRS(WT)-FLAG::leu1+, ade6-704, pNO13-sup3.5-ecoYtRNA-ura4-nmt1-mini-GST(Glycine6TAG)-6xhis       | This study |
| MBY10104   | act1 promoter -EcoYRS(WT)-FLAG::leu1+, pNO13T-his5TAG-sup3.5-met                                                   | This study |
| MBY10105   | act1 promoter -EcoYRS(WT)-FLAG::leu1+, pNO13T-his5TAG-sup3.5-EcoYtRNA                                              | This study |
| MBY10106   | act1 promoter -EcoYRS(WT)-FLAG::leu1+, pNO13-sup3.5-EcoYtRNA-nmt1-mini-his5TAG                                     | This study |

|          |                                                                                                      |            |
|----------|------------------------------------------------------------------------------------------------------|------------|
| MBY10107 | act1 promoter -azpRS::leu, pNO13T-his5TAG-sup3.5-met                                                 | This study |
| MBY10108 | act1 promoter -azpRS::leu, pNO13T-his5TAG-sup3.5-EcoYtRNA                                            | This study |
| MBY10109 | act1 promoter -azpRS::leu, pNO13-sup3.5-ecoYtRNA-nmt1-mini-his5TAG                                   | This study |
| MBY10110 | act1 promoter -benzoylRS::leu, ade6-704, ura4-294, his5DEL                                           | This study |
| MBY10111 | act1 promoter -benzoylRS::leu, ade6-704, ura4-294, his5DEL , pNO13T-his5TAG-sup3.5-EcoYtRNA          | This study |
| MBY10112 | act1 promoter -benzoylRS::leu, ade6-704, ura4-294, his5DEL , pNO13-sup3.5-ecoYtRNA-nmt1-mini-his5TAG | This study |
| MBY10113 | act1 promoter -benzoylRS::leu, ade6-704, ura4-294, his5DEL , pNO13-sup3.5-ecoYtRNA-nmt1-mini-his5TAG | This study |

**Supplemental Table S2:** List of all the constructs generated in this study.

| pTMB No. | Vector                                                     |
|----------|------------------------------------------------------------|
| pTMB 75  | pNO13T-spleu6flanks-bstYtRNA                               |
| pTMB 76  | pNO13T-his5TAG-spleu6flanks-bstYtRNA                       |
| pTMB 77  | pNO13T-his5TAG-sup3.5-bstYtRNA                             |
| pTMB 78  | pNO13-ser3-TAG                                             |
| pTMB 79  | pJK148-act1promoter-EcoYRS(WT) with FLAG-tag at C-terminus |
| pTMB 80  | pNO13T-his5TAG-sup3.5-met                                  |
| pTMB 81  | pNO13T-his5TAG-sup3.5-met-spleuflanks-BstYtRNA             |
| pTMB 82  | pNO13T-his5TAG-sup3.5-EcoYtRNA                             |
| pTMB 83  | pNO13T-his5TAG-sup3.5-met-spleuflanks-EcoYtRNA             |
| pTMB 84  | pNO13-sup3.5-EcoYtRNA                                      |
| pTMB 85  | pNO13-ser3-EcoYtRNA                                        |
| pTMB 86  | pNO13-sup3.5-ecoYtRNA-nmt1-mini-his5TAG                    |
| pTMB 87  | pNO13-sup3.5-ecoYtRNA-nmt1-mini-GST-52-TAG                 |
| pTMB 89  | pNO13-sup3.5-ecoYtRNA-nmt1-mini-his5TAG-6xhis-tag          |
| pTMB 103 | pNO13-sup3.5-ecoYtRNA-ura4-nmt1-mini-GST-52-TAG-6xhis-tag  |
| pTMB 109 | pJK148-act1promoter-EcoYRS-FLAG                            |
| pTMB 115 | pJK148-act1 promoter-azidoRS                               |
| pTMB 146 | pNO13-sup3.5-ecoYtRNA-ura4-nmt1-mini-rlc1-TAG-gfp          |
| pTMB 147 | pNO13-sup3.5-ecoYtRNA-ura4- nmt1-mini-GST(G6amb)-6xhis     |
| pTMB 176 | pJK148-act1 promoter-benzyolRS                             |

## Supplemental Methods

### Trichloroacetic Acid (TCA) Precipitation and Filter Aided Sample Preparation (FASP)

750  $\mu\text{L}$  cold sterilized water was added to 50  $\mu\text{L}$  purified protein. After the addition of 150  $\mu\text{L}$  1.85 M NaOH, the mixture was vortexed several seconds. 150  $\mu\text{L}$  cold trichloroacetic acid was added into the mixture following by placing on ice 10 min. Then the whole mixture was spun down at a speed of 14,000 rpf around 25 min. The white protein pellet could be observed in the bottom of Eppendorf tube after removing the supernatant.

TCA precipitated sample were suspended in 20  $\mu\text{L}$  lysis buffer (4 % (w/v) SDS, 100 mM Tris/HCl pH 7.6) and kept at 95 °C for 5min. Before starting sample processing, the lysate were clarified by centrifugation at 16,000  $g$  for 5 min. The supernatant was transferred to 10 kDa cut-off centrifugal filter (Amicon). The protein extract were mixed up with 400  $\mu\text{L}$  of UA (8M urea (Sigma, U5128) in 0.1 M Tris/Hcl pH 8.8) in the filter unit and centrifuged at a speed of 14,000  $g$  for 25 min. This step was repeated one more time and followed by the addition of 100  $\mu\text{L}$  IAA solution (38.5 mg iodoacetamide in UA buffer). The sample was mixed at 600 rpm in thermos-mixer for 1 min and incubated without mixing for 5 min at room temperature. The centrifugal filter unit was spun down at 14,000  $g$  for 30 min. After removing the flow-through, 400  $\mu\text{L}$  of UB (8M urea (Sigma, U5128) in 0.1 M Tris/HCl pH 8.0) was added to the filter unit and centrifuged at 14,000  $g$  for 40 min. This step was repeated twice. 120  $\mu\text{L}$  ABC (0.05 M  $\text{NH}_4\text{HCO}_3$  in water) with trypsin was added into the filter unit and incubated at 37 °C overnight. After trypsin digestion, the filter unit was transferred to a new tube and centrifuged at 14,000  $g$  20 min. 50  $\mu\text{L}$  0.5 M NaCl was added into filter unit, which was spun down at a speed of 14,000  $g$  for 20 min. The flow-through was collected and acidified with 0.05 %  $\text{CF}_3\text{COOH}$ .

### Gel processing, enzymatic digestion and peptide extraction

All processing of the gel plugs was performed by a MassPrep robotic protein handling system (Micromass, Manchester, UK) using the manufacturer's protocol, described briefly below.

Gel plug/s were destained twice using 50 % acetonitrile in 50 mM ammonium bicarbonate, rinsed with acetonitrile then allowed to air dry for 10 minutes, reduced with 10 mM dithiothreitol in 100 mM ammonium bicarbonate for 30 minutes followed by alkylation with 55 mM iodoacetamide in 100 mM ammonium bicarbonate. The gel plugs were then rinsed with acetonitrile, 100 mM ammonium bicarbonate followed by acetonitrile for a further 3 times. A 25  $\mu\text{L}$  aliquot of 6  $\text{ng}\mu\text{L}^{-1}$  trypsin was added to each sample and allowed to incubate at 37 °C for 4.5 h. The resulting peptides were initially extracted using 30  $\mu\text{L}$  of an aqueous solution containing 2 % acetonitrile and 1 % formic acid. A second extraction using 15  $\mu\text{L}$  of an aqueous solution containing 51 % acetonitrile and 0.5 % formic acid was then performed and combined with the first extraction.

### nanoLC-ESI-MS/MS Analysis of GST (G6Y)-6His and GST (G6AzF)-6His

Reversed phase chromatography was used to separate tryptic peptides prior to mass spectrometric analysis. Two columns were utilised, an Acclaim PepMap  $\mu$ -precolumn cartridge 300  $\mu\text{m}$  i.d. x 5 mm 5  $\mu\text{m}$  100 Å and an Acclaim PepMap RSLC 75  $\mu\text{m}$  x 25 cm 2  $\mu\text{m}$  100 Å (Thermo Scientific, San Jose, USA). The columns were installed on an Ultimate 3000 RSLCnano system (Dionex, Sunnyvale, USA). Mobile phase buffer A was composed of 0.1 % aqueous

formic acid and mobile phase B was composed of 80% acetonitrile containing 0.1 % formic acid. Samples were loaded onto the  $\mu$ -precursor column equilibrated in 2 % aqueous acetonitrile containing 0.1 % trifluoroacetic acid for 8 min at  $10 \mu\text{L min}^{-1}$  after which peptides were eluted onto the analytical column at  $300 \text{ nL min}^{-1}$  by increasing the mobile phase B concentration from 3 % B to 35 % over 35 min then to 90 % B and held over 4 min and re-equilibrated at 3 % B.

Eluting peptides were converted to gas-phase ions by means of electrospray ionisation and analysed on a Thermo Orbitrap Fusion, (Thermo Scientific, San Jose, USA). Survey scans of peptide precursors from 350 to 1500  $m/z$  were performed at 120K resolution (at 200  $m/z$ ) with a  $4 \times 10^5$  ion count target. Tandem MS was performed by isolation at 1.6 Th using the quadrupole, HCD fragmentation with normalized collision energy of 35, and rapid scan MS analysis in the ion trap. The  $\text{MS}^2$  ion count target was set to  $10^4$  and the max injection time was 200 ms. Precursors with charge state 2–7 were selected and sampled for  $\text{MS}^2$ . The dynamic exclusion duration was set to 45 s with a 10 ppm tolerance around the selected precursor and its isotopes. Monoisotopic precursor selection was turned on. The instrument was run in top speed mode with 2 s cycles.

### **MS Data Analysis**

The raw data was processed using MSConvert in ProteoWizard Toolkit (version 3.0.5759)<sup>1</sup>.  $\text{MS}^2$  spectra were searched with Mascot engine (Matrix Science, version 2.5.0) against a database of 5,268 sequences derived from PomBase v2.23, a comprehensive database for fission yeast *Schizosaccharomyces pombe* (<http://www.pombase.org>) appended with GST sequence and the common Repository of Adventitious Proteins Database (<http://www.thegpm.org/cRAP/index.html>). Database search parameters assumed digestion enzyme was trypsin, up to two missed cleavage sites were permitted with carbamidomethylation of cysteine as a fixed modification, amino-, azido-phenylalanine and oxidation of methionine were specified variable modifications. Precursor mass tolerance was 20 ppm and product ions were searched at 0.8 Da tolerances.
